# Supplementary material for: A small UTX stabilization domain of Trr is conserved within mammalian MLL3-4/COMPASS and is sufficient to rescue loss of viability in null animals
Source: PubMed Central journal article supplement — Genes Dev. 2020 Nov 1;34(21-22):1493–502. doi: 10.1101/gad.339762.120 (PMC7608747; doi:10.1101/gad.339762.120), 2020-11-01

## Supplemental Material

### Supplemental Methods

#### **Antibodies**

The following antibodies used in western blots and/or ChIP-seq were all generated in the Shilatifard lab: anti-H3K4me1, anti-H3K4me2, anti-H3K4me3, anti-H3, anti-Lpt, anti-dUtx, anti-UTX, and anti-MLL4. The following antibodies were purchased commercially: anti-GFP (Santa Cruz, B-2), anti-H3K4me1 [for wing disc IF] (Abcam, 8895), anti-FLAG (Sigma, M2), anti-Rbbp5 (Bethyl Labs, A300-109A), anti-Tubulin (DSHB, E7).

#### **Size Exclusion Chromatography**

Size exclusion separation of 293T cell extracts were performed with a Superose 6 column (GE Healthcare) on a SMART HPLC system (Pharmacia) in S100 buffer (30mM Tris-HCl pH 7.0, 140mM KCl, 3mM MgCl<sub>2</sub>).

#### **CRISPR/Cas9 MLL4-deletions**

Human MLL4-CT deletion gRNAs were: GTGGTGTTCGGCGGGTTACTC and GCATCCATTTCCGACAATTCC.

MLL4-NT deletion gRNAs were: GGAGCAGCTTTTGTACGAGC and GGGACATCTCCATCGTGATA.

Guide-RNAs for MLL4 promoter deletions to generate  $\Delta$ MLL4 HCT116 cells were: GAGGGGACTGATATGCACCGG and GTGCATGGTTCGGCAGGCGTAT.

#### **Chromatin Immunoprecipitation**

Cells were harvested and washed with ice-cold PBS for two times, and fixed with paraformaldehyde (1% final) for 10 min at RT. Then quench the paraformaldehyde with 2.5M (1/20) glycine and wash the cell pellets twice with PBS. Sonication: the cell pellet was resuspended with lysis buffer 1 (50 mM HEPES, pH=7.5, 140 mM NaCl, 1 mM EDTA, 10% Glycerol, 0.5% NP-40, 0.25% Triton X-100, 1 X protease inhibitors) and incubated on nutator at 4 °C for 10 min. Spin down at 500 g for 5 min and discard supernatant. The pellet was washed with lysis buffer 2 (10 mM Tris-HCl, pH=8.0, 200 mM NaCl, 1 mM EDTA, 0.5 mM EGTA, 1 X protease inhibitors) and resuspended with lysis buffer 3 (10 mM Tris-HCl, pH=8.0, 1 mM EDTA, 0.1% SDS, 1 X protease inhibitors). Adjust the final volume to be 10 times of the pellet with lysis buffer 3. Sonication with 1 ml Covaris tubes at 10% duty cycle, 175 peak intensity power, 200 cycles per burst for 60-1200s. Sonicated DNA size was checked on a 2% agarose gel. We next added 10% of 10X ChIP Dilution Buffer (10% Triton x-100, 1 M NaCl, 1% Na-Deoxycholate, 5% N-Lauroylsarcosine, 5 mM EGTA) to the lysate and spun at 20,000 g for 15 min at 4 °C to pellet debris. Supernatant was collected and the concentration measured by nanodrop. A small aliquot was saved as input. Antibody was added (~ 10 ug per antibody) to

each cell lysate and incubated at 4 °C on nutator overnight. The next morning, protein A/G agarose beads (Santa Cruz) were washed in RIPA buffer (50 mM HEPES, pH=7.5, 500 mM LiCl, 1 mM EDTA, 1.0% NP-40, 0.7% Na-Deoxycholate) before being incubated with chromatin/antibody solution at 4 °C on nutator for 4 hours. Samples were next spun down in 15 ml conical tubes at 200g for 5 min at 4 °C and supernatant was discarded. Beads were pelleted in 15 ml conical tubes at 200g for 5 min at 4 °C and washed in RIPA Buffer 4 times at 4 °C on nutator for 10 min each time. Beads were washed once with 1 ml of cold TE + 50 mM NaCl and spun at 1000 g for 3 min at 4 °C and remove any residual buffer. Beads were resuspended in 200µl Elution Buffer (50 mM Tris-HCl, pH=8.0, 10 mM EDTA, 1.0% SDS) and incubated in 65 °C water bath for 30 min, vortexing gently twice in between. Beads were spun down at 1000 g for 3 min at RT and supernatant was transferred to a new tube. To reverse crosslinks, a 50µl aliquot was diluted in 150 µl (3 volumes) Elution Buffer and incubated at 65 °C for 6-15 h. We added 4 µl of 20 mg/ml Protease K and incubated at 55 °C for 2 h to degrade protein. DNA was purified using Qiagen PCR Purification columns.

### **Supplemental Table 1.**

Unfiltered mass-spectrometry data is available for all three individual replicates. The following measurements and information are given for each peptide identified: Accession number, Peptide Count, NSAF (normalized spectral abundance factor), emPAI (exponentially modified protein abundance index), Spectral Count, Percent Sequence Coverage, and Description of protein identified.

## Supplemental Figure Legends

### Supplemental Figure 1.

- A. Cartoon depiction of the *trr[1]* complementation assay. Virgin females carrying *trr[1]/FM7* are crossed to males carrying the *trr*-rescue, mini-white transgene on the third chromosome. Presence of red-colored, non-bar eyes in the male F1 progeny indicates the transgene was able to rescue *trr[1]*-associated lethality.
- B. *trr[1];;trr-Del4* flies reared at 29°C display ectopic L3/L4 cross-vein phenotypes identical to catalytic-dead *trr-C/A* flies, as previously reported (Rickels et al. 2017).

### Supplemental Figure 2.

- A. Doxycycline-inducible 293Trex cells expressing the GFP-MLL4-UTX-interacting domain (567aa) were fractionated by size-exclusion chromatography. UTX co-elutes with endogenous MLL4 complex in cells without dox; however, induced expression of the MLL4-GFP fragment competes for UTX binding, as evidenced by co-elution in later fractions.
- B. Western blots comparing MLL4 and UTX protein levels in WT versus MLL4-KO HCT116 cells, in which UTX levels are diminished in the absence of MLL3 or MLL4.
- C. RNA-sequencing track example shows UTX (*KDM6A*) mRNA levels are unchanged in the absence of MLL4.

### Supplemental Figure 3.

- A. Alignments of the same peptide sequence shown in Fig. 3A also including five *Drosophila* species and multiple invertebrate species for improved alignment. Note the interrupting sequences present in *Drosophila*, which are predicted to form extended coils by HHPred secondary sequence prediction software (<https://toolkit.tuebingen.mpg.de/#/tools/hhpred>).

### Supplemental Figure 4.

- A. Western blots comparing nuclear UTX levels in WT,  $\Delta$ MLL4, MLL4- $\Delta$ NT, and MLL4- $\Delta$ CT HCT116 cells.
- B. Western blots show the MLL4-HMG-USD expression construct does not require an exogenous NLS to fully restore nuclear UTX levels in  $\Delta$ MLL4 cells. Also, an MLL3-HMG-USD restores UTX levels similar to the MLL4-HMG-USD.
- C. Immunoprecipitation experiments reveal UTX most likely interacts with MLL3/4 through its N-terminal TPR domains. Flag-tagged constructs were created to express overlapping NT, mid, and CT fragments of UTX for transfection and immunoprecipitation. The NT-fragment pulls down endogenous MLL4 in 293T cells.
- D. UTX-NT co-immunoprecipitates with the MLL4-HMG-USD-GFP when co-transfected in MLL4-KO HCT116 cells.
- E. Western blots showing strong nuclear UTX stabilization after ~72 hours of doxycycline-induced HMG-USD transgene expression in MLL4-KO HCT116 cells.

**Supplemental Figure 5.**

- A. A venn diagram showing of the 2112  $\Delta$ MLL4 down-regulated genes (red), 148 (green) are transcriptionally “rescued” after 8 days of HMG-USD expression.
- B. ChIP-seq for H3K27me3 in  $\Delta$ MLL4-T/O cells after 0, 2, 4 days of dox induction and presented as metapeak plots. Left is centered on total HMG-USD peaks (day 4) and right is centered on total H3K27me3 peaks (day0).

# Supplemental Figure 1

A

$$\text{P: } \begin{array}{c} \text{♀} \\ \frac{yw, trr[1]}{FM7} ; ; \frac{+}{+} \end{array} \times \begin{array}{c} \text{♂} \\ \frac{+}{Y} ; ; \frac{trr\text{-rescue, mini-white}}{+} \end{array}$$

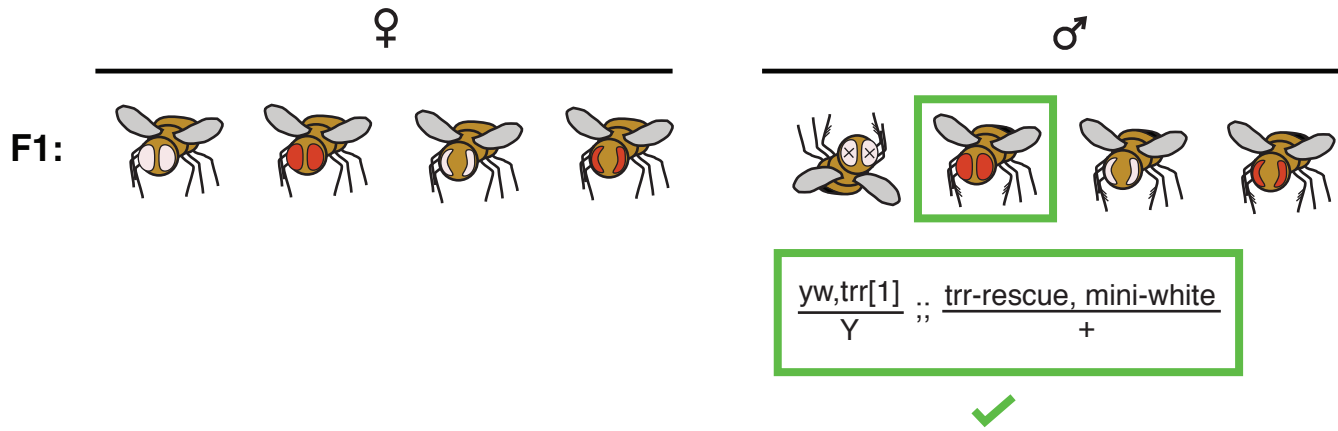

B

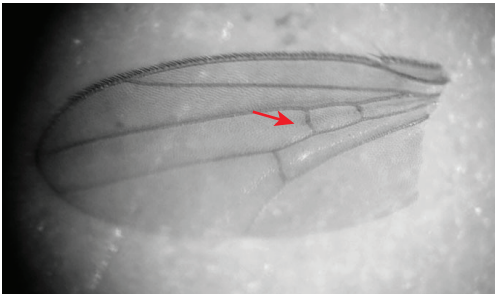

# Supplemental Figure 2

**A**

## 293Trex Cells, Dox-inducible MLL4-domain-GFP (567aa)

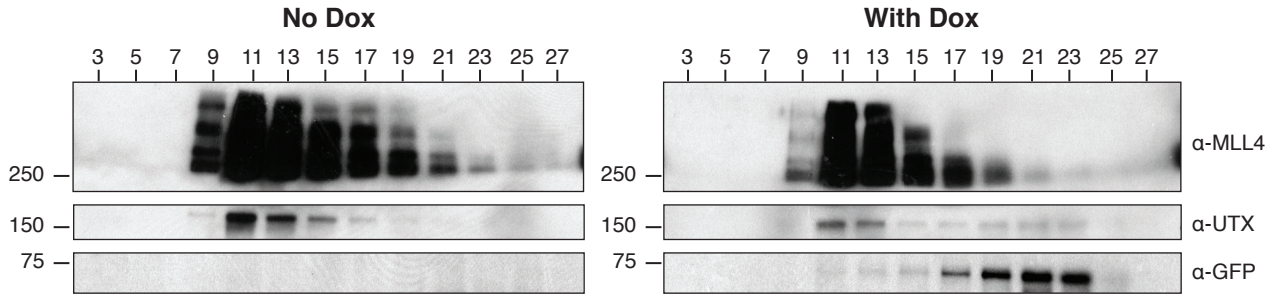

**B**

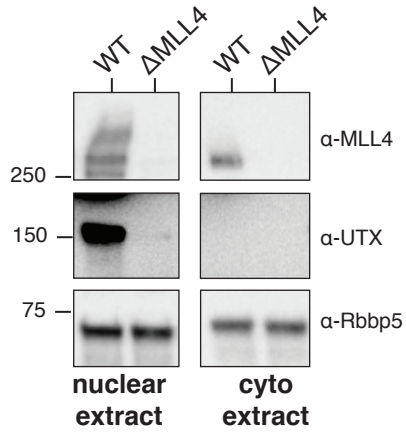

**C**

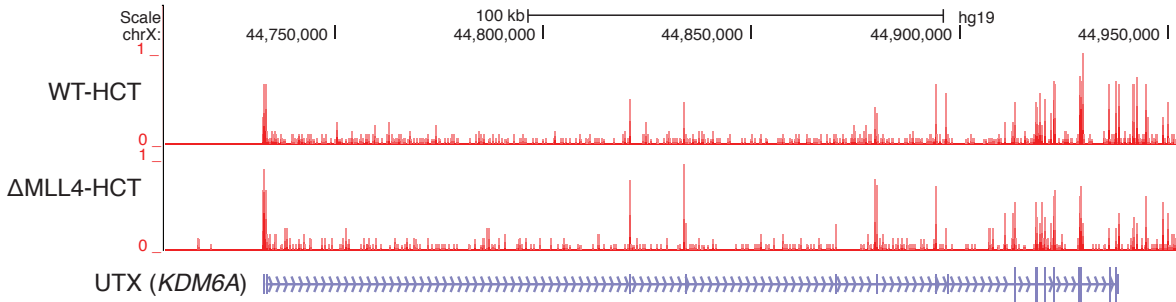



# Supplemental Figure 4

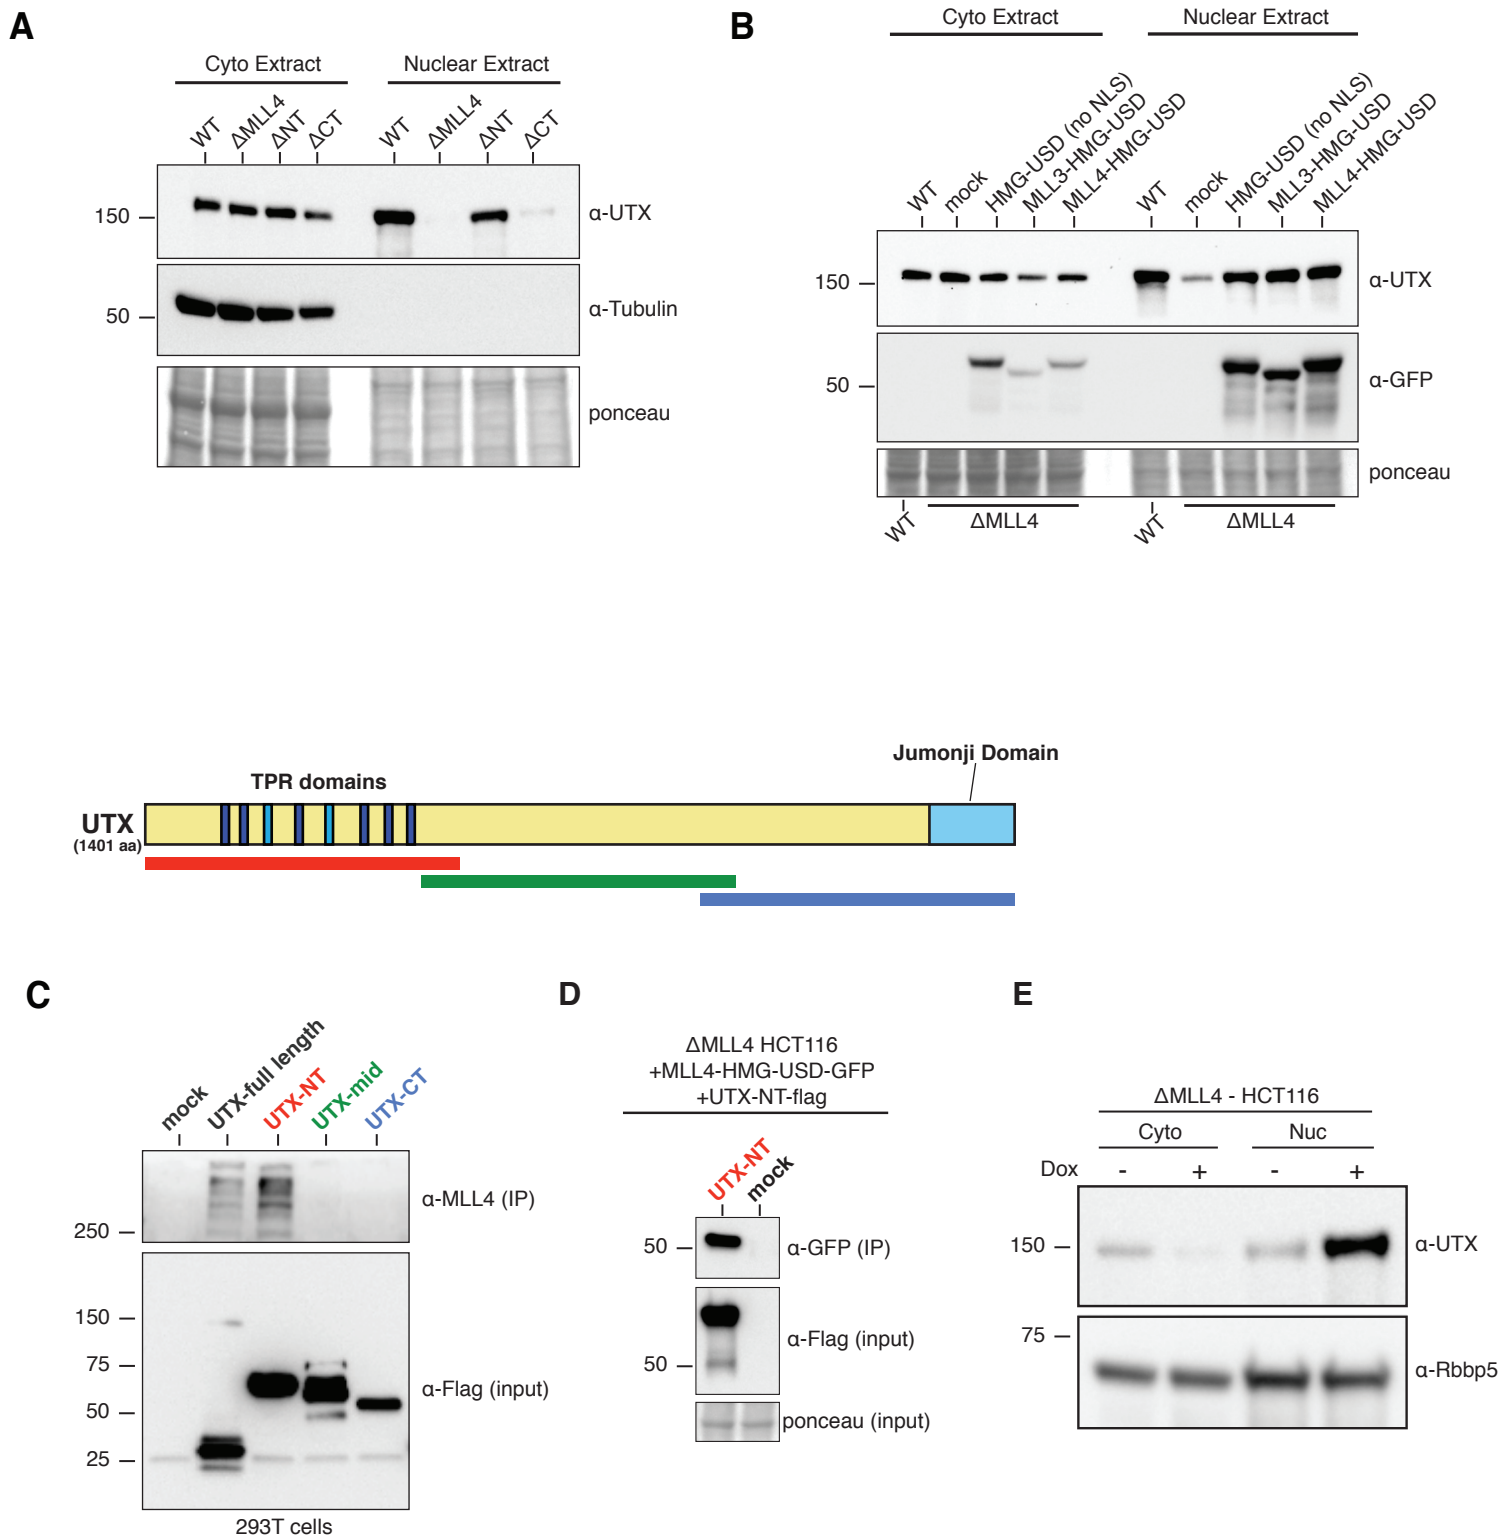



## Supplemental Figure 5

**A**

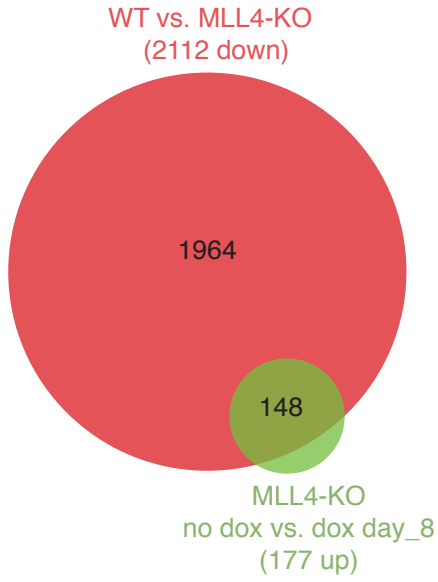

**B**

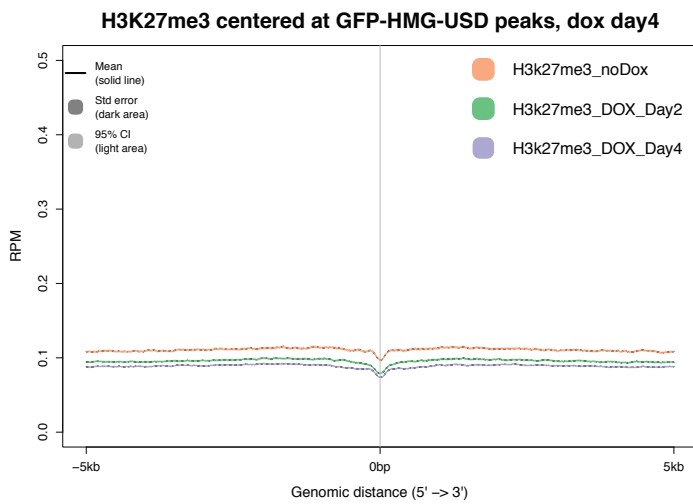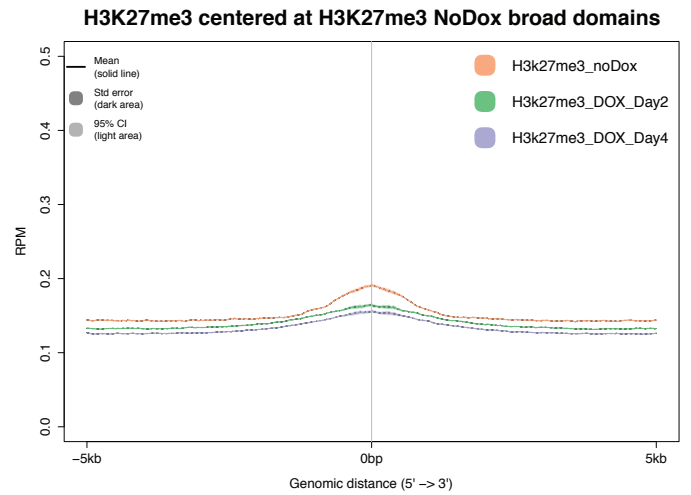

Supplement: supp_gad.339762.120_Supplemental_Material_.pdf [file supp_gad.339762.120_Supplemental_Material_.pdf]
